# Supplementary figures and images for: Effects of supplemental fish oil on resting metabolic rate, body composition, and salivary cortisol in healthy adults
Source: Springer Nature journal article supplement (doi:10.1186/1550-2783-7-31), 2010-01-05

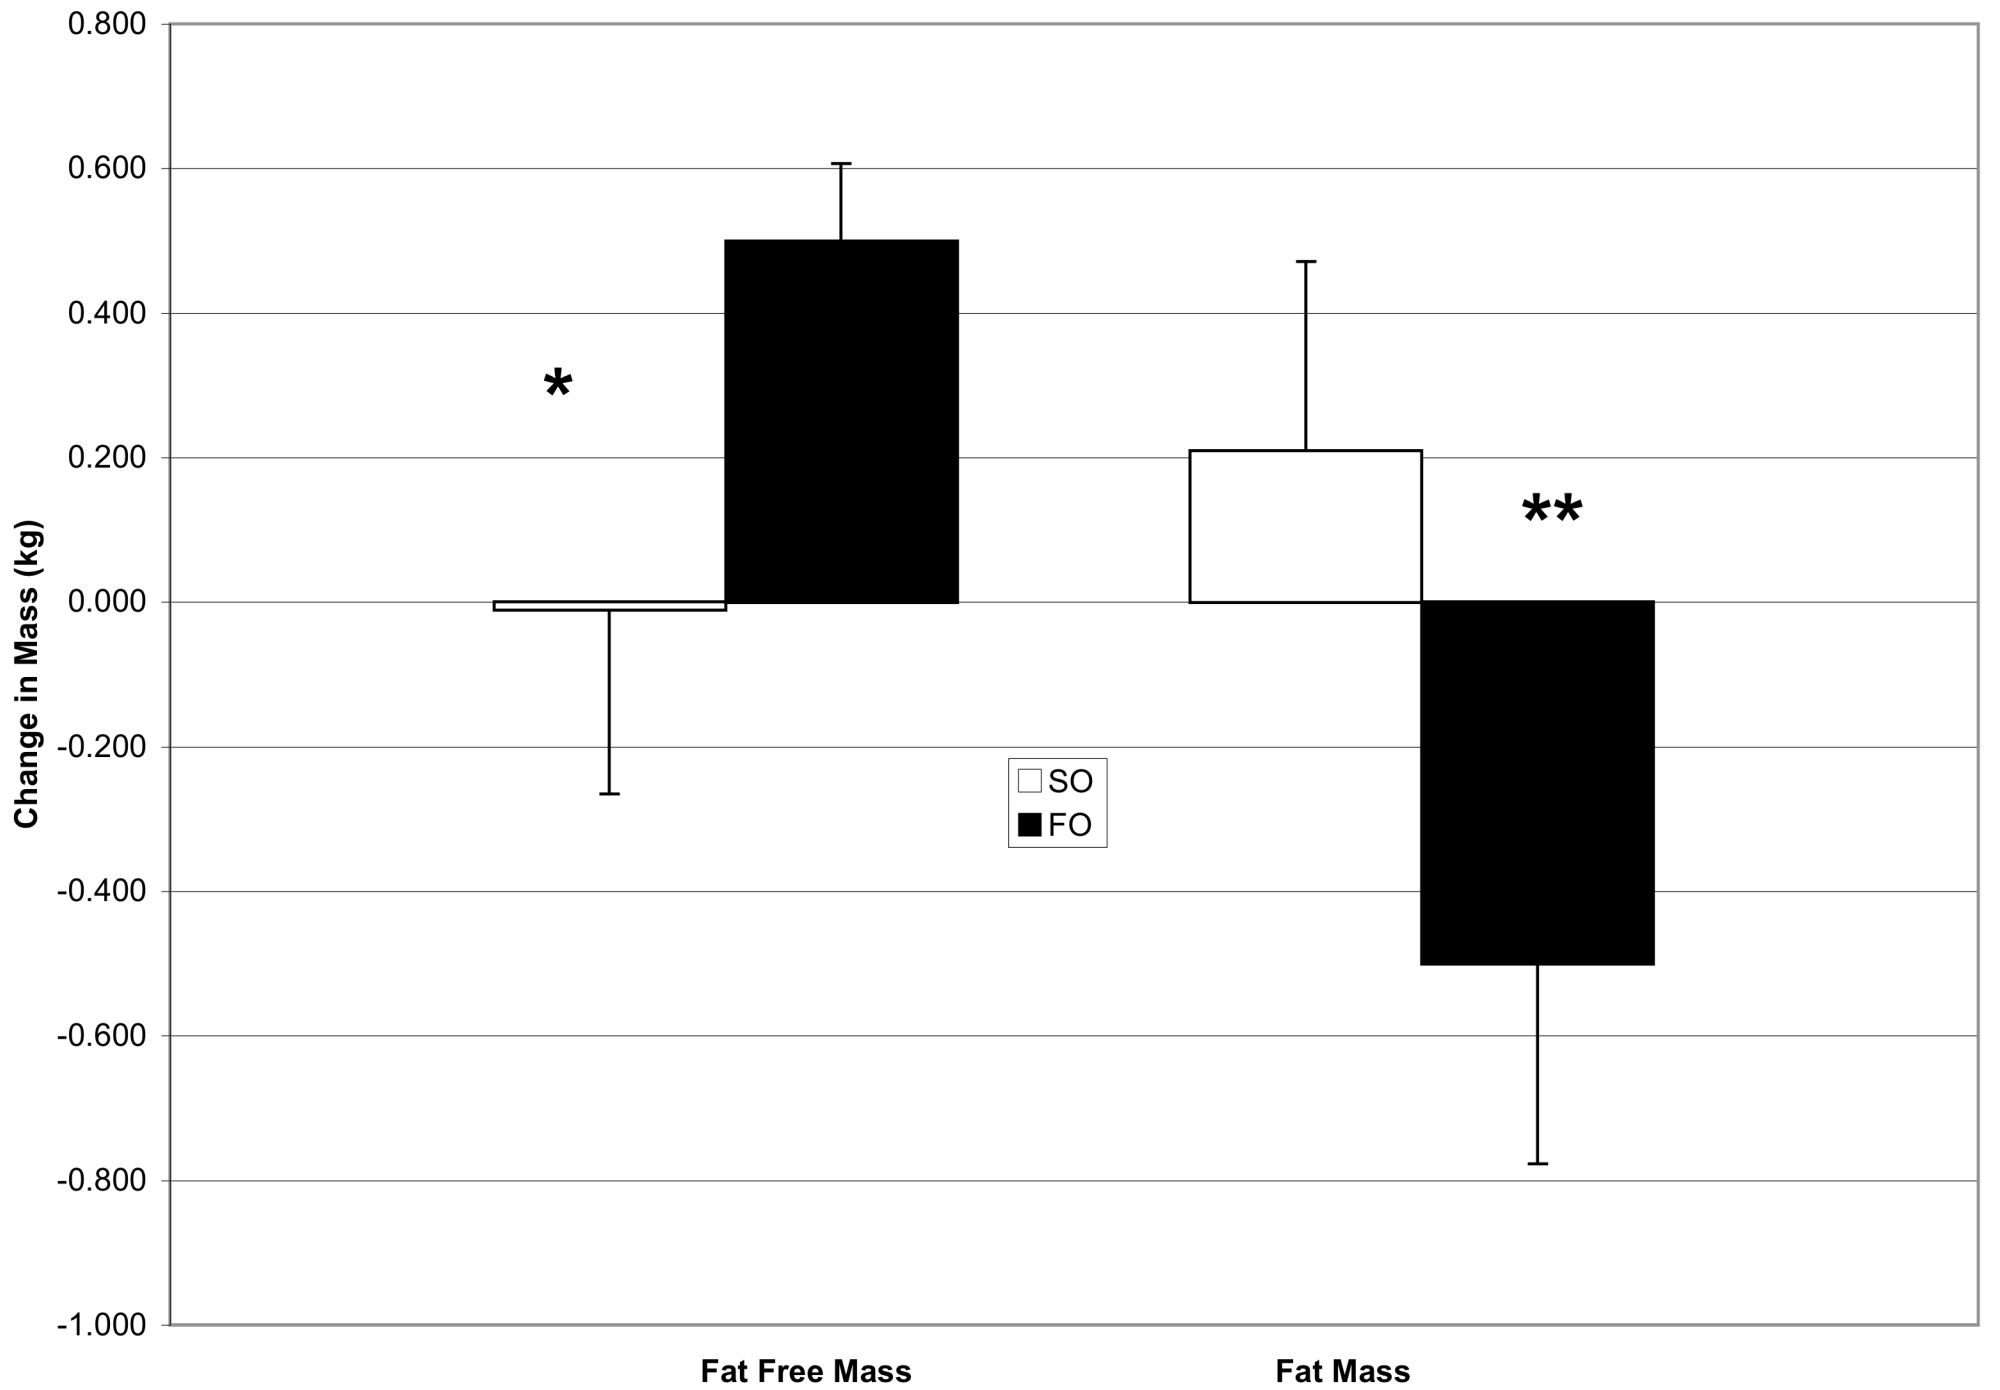

Supplement: 12970_2010_204_MOESM1_ESM.pdf [file 12970_2010_204_MOESM1_ESM.pdf]
